# Supplementary material
Source: HighWire-hosted journal article supplement (https://jitc.bmj.com/content/7/1/88)

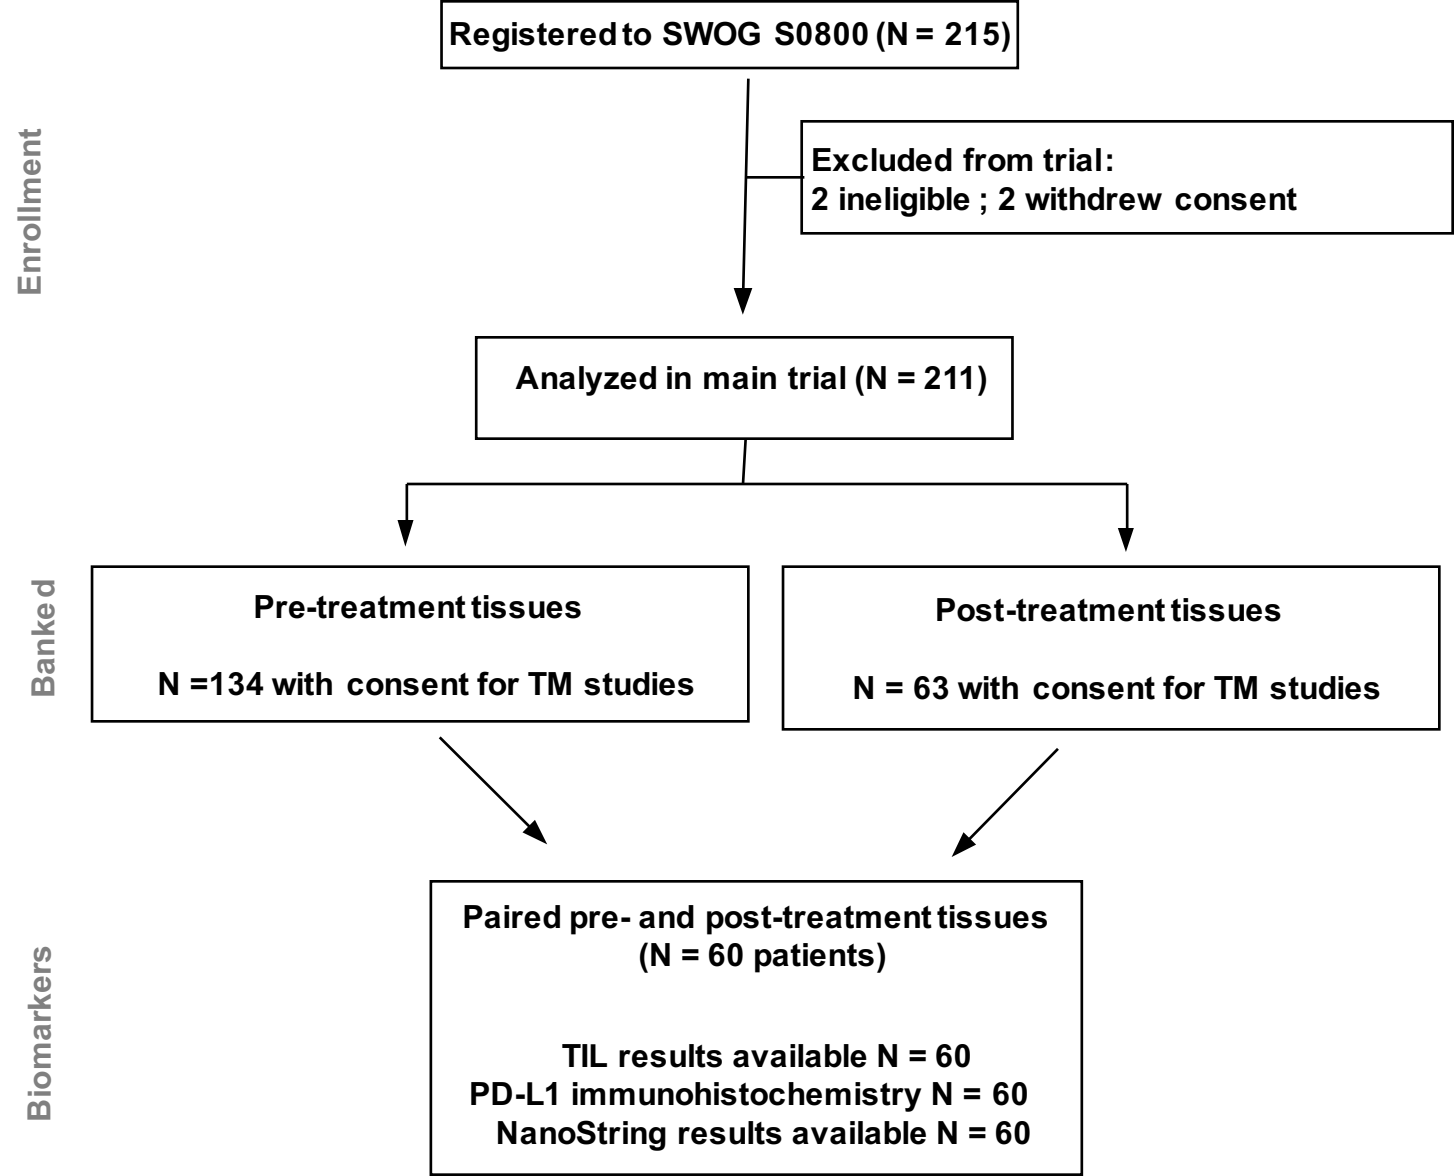

Supplement: media-1 [file media-1.pdf]
