# Supplementary material
Source: HighWire-hosted journal article supplement (https://jitc.bmj.com/content/7/1/88)

**B**

MKI67 expression levels in pre-treatment samples

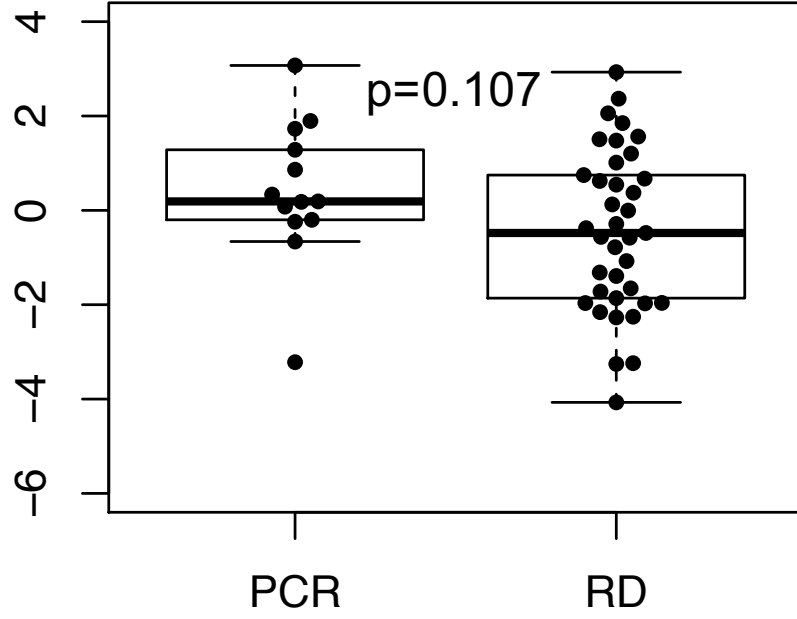**A**

Age of patient

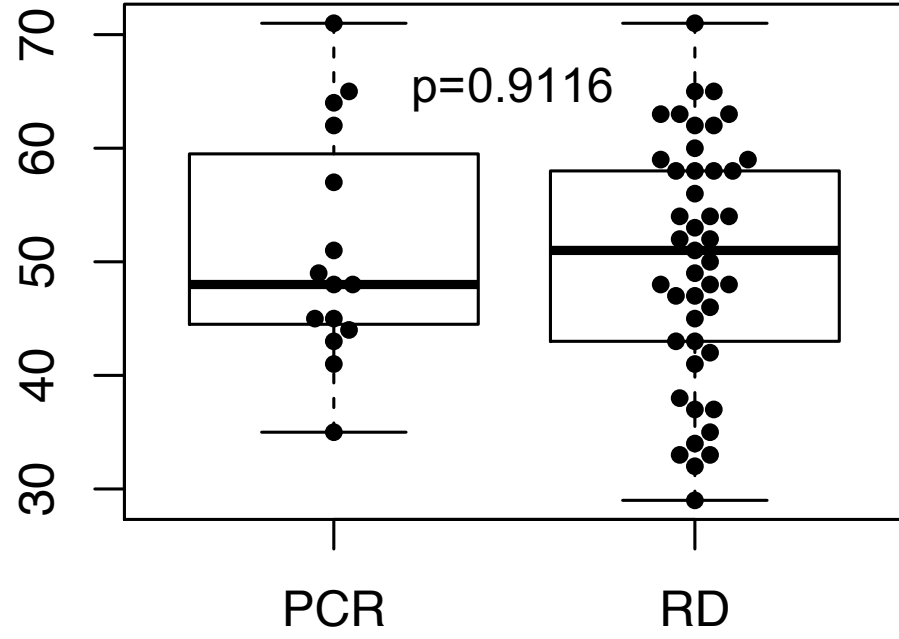**C**

MKI67 expression levels in post-treatment samples

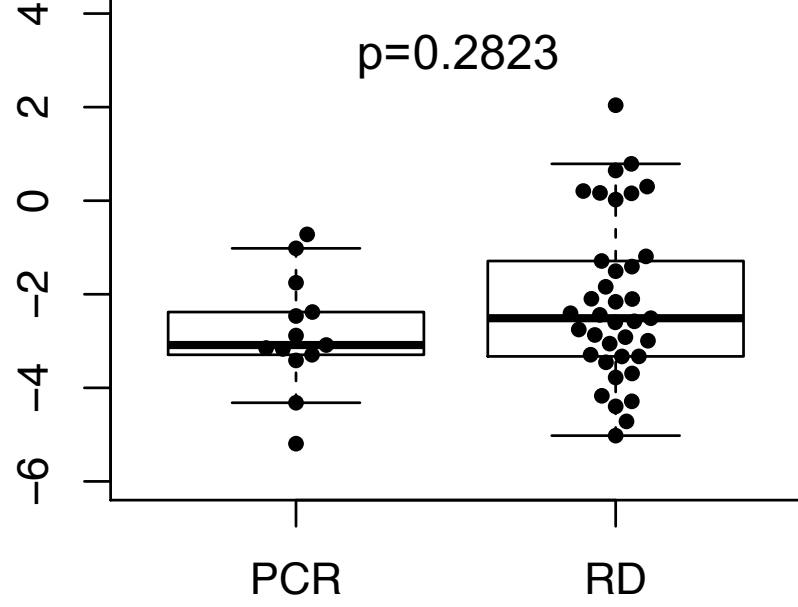

Supplement: media-5 [file media-5.pdf]
