# Supplementary material
Source: HighWire-hosted journal article supplement (https://jitc.bmj.com/content/7/1/88)

**A**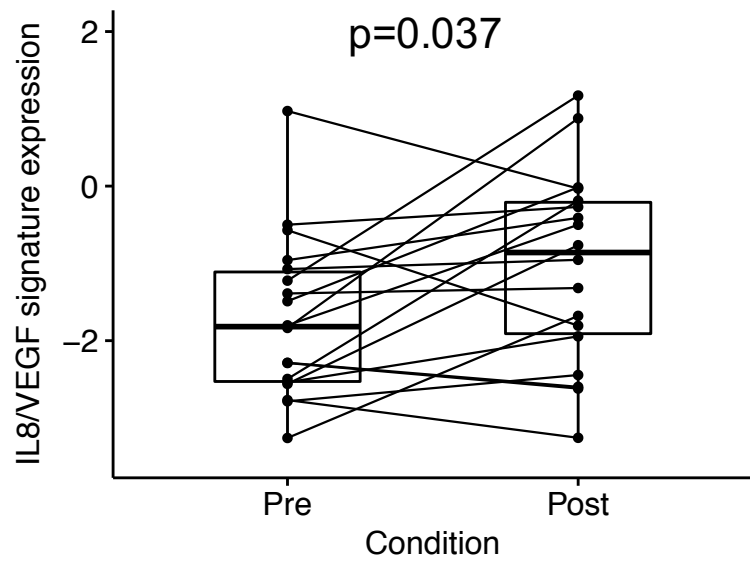**B**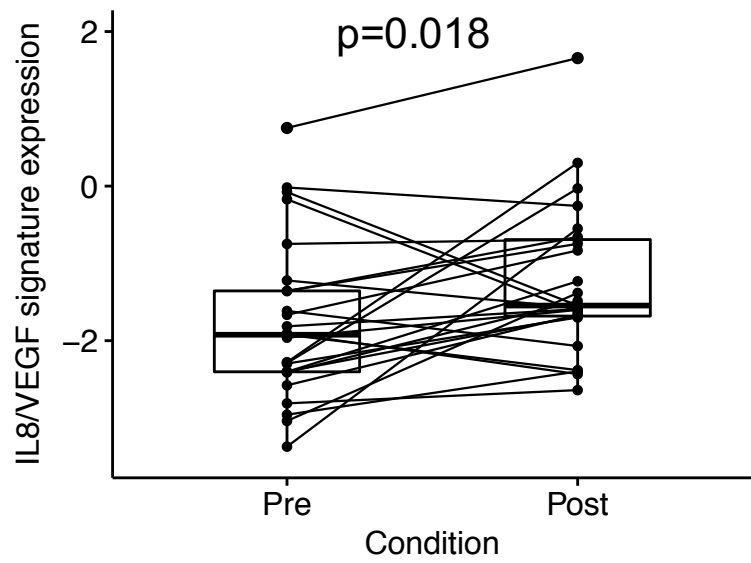**C**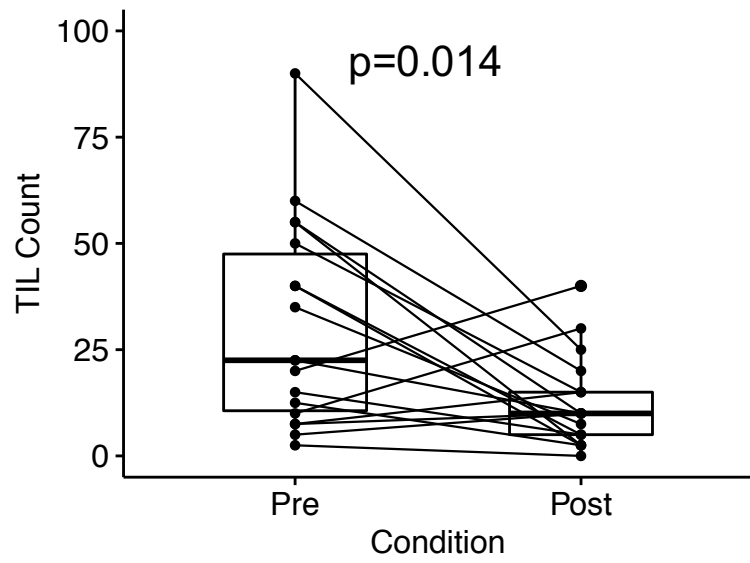**D**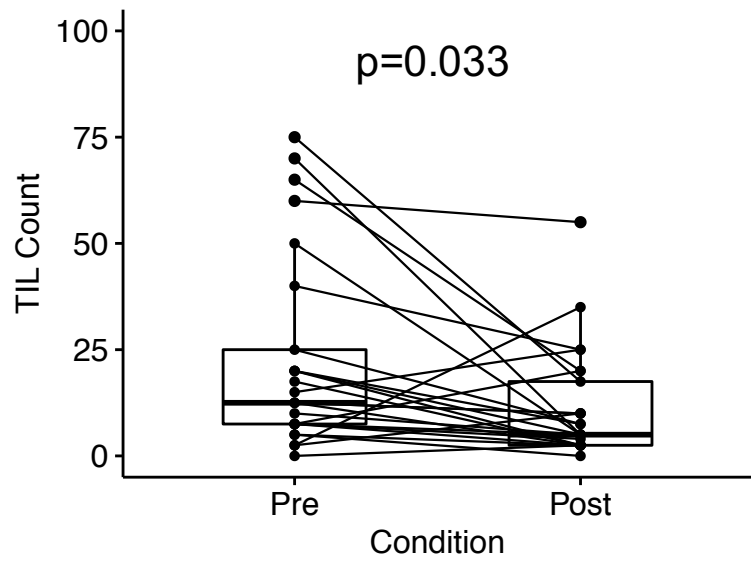

Supplement: media-6 [file media-6.pdf]
